# Supplementary material
Source: PubMed Central journal article supplement (PMC7986049)
Supplement: bloodBLD2020008021-suppl1.pdf [file bloodBLD2020008021-suppl1.pdf]

**Supplemental Table 1.** Transient protocol of use for rituximab in immune-mediated TTP (translated).

|                                                                                                                                                                                                                                                                                                                                                                                                                                                                                                                                                                                                                                                                                                                                                                                                                                                                                                                                                                                                                                                                                                                                                                                                                                                                                                                                                                                                                     |                                                                                                                                                                                                                                                                                                                                                                                                                                                                                                                                                                                                                                                                                                       |
|---------------------------------------------------------------------------------------------------------------------------------------------------------------------------------------------------------------------------------------------------------------------------------------------------------------------------------------------------------------------------------------------------------------------------------------------------------------------------------------------------------------------------------------------------------------------------------------------------------------------------------------------------------------------------------------------------------------------------------------------------------------------------------------------------------------------------------------------------------------------------------------------------------------------------------------------------------------------------------------------------------------------------------------------------------------------------------------------------------------------------------------------------------------------------------------------------------------------------------------------------------------------------------------------------------------------------------------------------------------------------------------------------------------------|-------------------------------------------------------------------------------------------------------------------------------------------------------------------------------------------------------------------------------------------------------------------------------------------------------------------------------------------------------------------------------------------------------------------------------------------------------------------------------------------------------------------------------------------------------------------------------------------------------------------------------------------------------------------------------------------------------|
| <b>Background</b>                                                                                                                                                                                                                                                                                                                                                                                                                                                                                                                                                                                                                                                                                                                                                                                                                                                                                                                                                                                                                                                                                                                                                                                                                                                                                                                                                                                                   |                                                                                                                                                                                                                                                                                                                                                                                                                                                                                                                                                                                                                                                                                                       |
| <p>The use of rituximab had been authorized in 2008 through a transient protocol of use for the treatment of “severe idiopathic thrombotic purpura (platelets &lt; 30 000/ mm<sup>3</sup>) in patients with a contra-indication for or failure of corticosteroids and/or intravenous immunoglobulins and contra-indication to or failure of splenectomy.</p> <p>In 2014, a request for a transient protocol of use had been submitted for the indication of <b>autoimmune thrombotic thrombocytopenic purpura at the acute phase refractory to daily plasma exchange (TPE), as defined by the absence of significant improvement of platelet count at day 5 of the management despite daily TPE, and/or by a worsening of platelet count at TPE tapering, following the advice of the reference center.</b></p> <p>Since then, the management of TTP has moved on, with new compounds that obtained a label in this indication (caplacizumab).</p> <p>The reference center for the management of thrombotic microangiopathies (CNR-MAT) requests now a transient protocol of use for rituximab in the following indications:</p> <p>“- Autoimmune TTP at the acute phase at diagnosis, in association with TPE, corticosteroids and caplacizumab;<br/>         - Autoimmune TTP in clinical remission but with a persistently severe ADAMTS13 deficiency (preemptive treatment), to prevent clinical relapses.”</p> |                                                                                                                                                                                                                                                                                                                                                                                                                                                                                                                                                                                                                                                                                                       |
| <b>Question</b>                                                                                                                                                                                                                                                                                                                                                                                                                                                                                                                                                                                                                                                                                                                                                                                                                                                                                                                                                                                                                                                                                                                                                                                                                                                                                                                                                                                                     | <p>The opinion of the advisory board is solicited on this demand of temporary protocol of use for the two following indications:</p> <ul style="list-style-type: none"> <li>- According to the provided documents, the advice of the working group on onco-hematology (WGOH) is requested regarding the benefit/risk balance of the use of rituximab frontline in the treatment of TTP at the acute phase in association to the standard treatment;</li> <li>- According to the provided documents, the advice of the working group on onco-hematology (WGOH) is requested regarding the benefit/risk balance of the use of rituximab as a preemptive strategy to avoid clinical relapses.</li> </ul> |
| <b>Votes</b>                                                                                                                                                                                                                                                                                                                                                                                                                                                                                                                                                                                                                                                                                                                                                                                                                                                                                                                                                                                                                                                                                                                                                                                                                                                                                                                                                                                                        |                                                                                                                                                                                                                                                                                                                                                                                                                                                                                                                                                                                                                                                                                                       |
| Number of voting persons among the total number                                                                                                                                                                                                                                                                                                                                                                                                                                                                                                                                                                                                                                                                                                                                                                                                                                                                                                                                                                                                                                                                                                                                                                                                                                                                                                                                                                     | <b>9</b>                                                                                                                                                                                                                                                                                                                                                                                                                                                                                                                                                                                                                                                                                              |
| Number of favorable advices                                                                                                                                                                                                                                                                                                                                                                                                                                                                                                                                                                                                                                                                                                                                                                                                                                                                                                                                                                                                                                                                                                                                                                                                                                                                                                                                                                                         | <b>9</b>                                                                                                                                                                                                                                                                                                                                                                                                                                                                                                                                                                                                                                                                                              |
| Number of advices against                                                                                                                                                                                                                                                                                                                                                                                                                                                                                                                                                                                                                                                                                                                                                                                                                                                                                                                                                                                                                                                                                                                                                                                                                                                                                                                                                                                           |                                                                                                                                                                                                                                                                                                                                                                                                                                                                                                                                                                                                                                                                                                       |
| Number of abstentions                                                                                                                                                                                                                                                                                                                                                                                                                                                                                                                                                                                                                                                                                                                                                                                                                                                                                                                                                                                                                                                                                                                                                                                                                                                                                                                                                                                               | <b>0</b>                                                                                                                                                                                                                                                                                                                                                                                                                                                                                                                                                                                                                                                                                              |
| <b>Answer to the question</b>                                                                                                                                                                                                                                                                                                                                                                                                                                                                                                                                                                                                                                                                                                                                                                                                                                                                                                                                                                                                                                                                                                                                                                                                                                                                                                                                                                                       |                                                                                                                                                                                                                                                                                                                                                                                                                                                                                                                                                                                                                                                                                                       |
| Main advices                                                                                                                                                                                                                                                                                                                                                                                                                                                                                                                                                                                                                                                                                                                                                                                                                                                                                                                                                                                                                                                                                                                                                                                                                                                                                                                                                                                                        | <p><b>Favorable advice:</b> the WGOH is unanimously favorable for this temporary protocol of use (9 votes “FOR”). A common indication for both indications formerly proposed as well as the exact posology must be finalized with the reference center (Dr COPPO)</p>                                                                                                                                                                                                                                                                                                                                                                                                                                 |
| Minor advices                                                                                                                                                                                                                                                                                                                                                                                                                                                                                                                                                                                                                                                                                                                                                                                                                                                                                                                                                                                                                                                                                                                                                                                                                                                                                                                                                                                                       |                                                                                                                                                                                                                                                                                                                                                                                                                                                                                                                                                                                                                                                                                                       |
| <b>Proposed action:</b>                                                                                                                                                                                                                                                                                                                                                                                                                                                                                                                                                                                                                                                                                                                                                                                                                                                                                                                                                                                                                                                                                                                                                                                                                                                                                                                                                                                             | <b>By</b> <span style="float: right;"><b>Schedule</b></span>                                                                                                                                                                                                                                                                                                                                                                                                                                                                                                                                                                                                                                          |
|                                                                                                                                                                                                                                                                                                                                                                                                                                                                                                                                                                                                                                                                                                                                                                                                                                                                                                                                                                                                                                                                                                                                                                                                                                                                                                                                                                                                                     |                                                                                                                                                                                                                                                                                                                                                                                                                                                                                                                                                                                                                                                                                                       |

**Supplemental Table 2.** *Definition of outcomes*

|                   |                                                                                                                                                                                                                                                                                                                 |
|-------------------|-----------------------------------------------------------------------------------------------------------------------------------------------------------------------------------------------------------------------------------------------------------------------------------------------------------------|
| Complete response | Full resolution of the neurologic manifestations (or stabilization of neurologic abnormalities in patients considered as having permanent sequels) and renal failure and recovery of normal platelet count ( $>150 \times 10^3/\text{mm}^3$ ) for at least two days.                                            |
| Durable remission | Complete response with no further thrombocytopenia, renal failure or clinical worsening for more than 30 consecutive days from the first day of platelet count recovery. At this step, the episode is considered as ended.                                                                                      |
| Exacerbation      | Initial treatment response but reappearance of clinical manifestations and/or thrombocytopenia ( $<100 \times 10^3/\text{mm}^3$ for at least 2 days) before durable remission (complete response with no further thrombocytopenia or clinical worsening for $> 30$ consecutive days of platelet count recovery) |
| Relapse           | Reappearance of clinical features of iTTP (thrombocytopenia [ $<100 \times 10^3/\text{mm}^3$ for at least 2 days], associated or not with organ involvement) (i.e., a new episode of iTTP) after durable remission had been achieved.                                                                           |
| Refractoriness    | Platelet count after 4 days of standard intensive treatment less than double the initial, together with persistently elevated LDH levels.                                                                                                                                                                       |

**Supplemental Table 3.** Clinical features and treatment of patients on diagnosis treated without caplacizumab during the recruitment period of the triplet regimen cohort. Data of both cohorts were compared.

| Characteristics                                               | iTTP patients (ADAMTS13 <10%)<br>treated without caplacizumab<br>(N=22) | P-value |
|---------------------------------------------------------------|-------------------------------------------------------------------------|---------|
| Age (y)                                                       | 45 (35-56)                                                              | 0.88    |
| Female sex                                                    | 15 (68%)                                                                | 0.86    |
| Weight (kg)                                                   | 78 (65-100)                                                             | 0.25    |
| Body mass index                                               | 29 (23.3-33)                                                            | 0.30    |
| Ethnicity                                                     |                                                                         |         |
| White                                                         | 19                                                                      | 0.89    |
| African-West Indies                                           | 2                                                                       |         |
| Asian                                                         | 1                                                                       |         |
| Ongoing antiplatelet agent/anticoagulation                    | 2 (9%)                                                                  | 0.89    |
| Antiplatelet agent                                            | 2                                                                       |         |
| Anticoagulant                                                 | 0                                                                       |         |
| Relapse                                                       | 8 (33.3%)                                                               | 0.01    |
| Cerebral involvement                                          | 13 (59%)                                                                | 0.86    |
| Headache                                                      | 5                                                                       |         |
| Confusion                                                     | 7                                                                       |         |
| Seizure                                                       | 0                                                                       |         |
| Coma                                                          | 0                                                                       |         |
| Focal deficiency                                              | 4                                                                       |         |
| Cardiac involvement                                           | 9 (41%)                                                                 | 0.83    |
| Hemoglobin (g/dL)                                             | 9.3 (8-11.3)                                                            | 0.28    |
| Platelet count (x 10 <sup>3</sup> /mm <sup>3</sup> )          | 18 (9.5-32)                                                             | 0.17    |
| LDH level xN (U/L)                                            | 3 (2.25-3)                                                              | 0.20    |
| Serum creatinine (µmol/L)                                     | 111 (66-158)                                                            | 0.47    |
| GFR (mL/min/1.73m <sup>2</sup> ) (MDRD)                       | 90 (61-119)                                                             | 0.41    |
| Anti-ADAMTS13 antibodies (U/mL)                               | 69 (46-100)                                                             | 0.73    |
| French Severity score:                                        |                                                                         |         |
| 0-2                                                           | 18                                                                      | 0.92    |
| 3-4                                                           | 4                                                                       |         |
| Immunosuppressive therapy                                     |                                                                         |         |
| -Corticosteroids                                              | 15 (68%)                                                                | <0.01   |
| -Rituximab                                                    | 14 (63%)                                                                | <0.01   |
| Time between 1 <sup>st</sup> infusion and 1 <sup>st</sup> TPE | 5 (3-10)                                                                | 0.01    |
| Other therapies                                               | 1                                                                       | 0.02    |
| Twice-daily TPE                                               | 1                                                                       |         |
| Cyclophosphamide                                              | 0                                                                       |         |
| Splenectomy                                                   | 0                                                                       |         |
| Vincristine                                                   | 0                                                                       |         |
| Bortezomib                                                    | 0                                                                       |         |
| > 1 salvage therapy                                           | 0                                                                       |         |

Abbreviations: LDH: lactate dehydrogenase. GFR: Glomerular Filtration Rate. MDRD Modification of Diet in Renal Disease. TPE: therapeutic plasma exchange. ADAMTS13: A Disintegrin And Metalloproteinase with ThromboSpondin-1 motifs, 13<sup>rd</sup> member. Data are given as median (25th-75th percentile) for quantitative variables and as n (%) for qualitative variables. Severe ADAMTS13 activity was defined as an activity <10% (normal range for ADAMTS13 activity: 50%-100%). The positivity threshold for anti-ADAMTS13 immunoglobulin G (IgG) was 12 U/mL, according to the manufacturer's instructions (Technoclone<sup>®</sup>). Cardiac involvement was defined as an increase of troponin and/or electrocardiographic abnormalities. Patients at high risk of early death of iTTP were defined by a French severity score  $\geq 3$  (cerebral involvement: yes=1 / no=0, LDH:  $>10 \times \text{U.LN}=1$  /  $\leq 10 \times \text{U.LN}=0$ , age:  $>60$  years=2 /  $>40$  and  $\leq 60$  years=1 /  $\leq 40$  years=0) <sup>1</sup>.

## Reference

1. Benhamou Y, Assie C, Boelle PY, et al. Development and validation of a predictive model for death in acquired severe ADAMTS13 deficiency-associated idiopathic thrombotic thrombocytopenic purpura: the French TMA Reference Center experience. *Haematologica* 2012;97(8):1181-6.

**Supplemental Table 4.** Maximum platelet count reached in the 19 patients of the triplet regimen cohort who developed thrombocytosis

| Patient # | Platelet count (x 10 <sup>3</sup> /mm <sup>3</sup> ) |
|-----------|------------------------------------------------------|
| 2876      | 481                                                  |
| 2797      | 484                                                  |
| 2793      | 497                                                  |
| 2859      | 508                                                  |
| 2802      | 517                                                  |
| 2764      | 524                                                  |
| 2757      | 526                                                  |
| 2806      | 526                                                  |
| 2801      | 528                                                  |
| 2747      | 540                                                  |
| 2786      | 576                                                  |
| 2739      | 582                                                  |
| 2883      | 607                                                  |
| 2831      | 658                                                  |
| 2885      | 682                                                  |
| 2622      | 691                                                  |
| 2742      | 741                                                  |
| 2777      | 742                                                  |
| 2761      | 949                                                  |

## **Appendix**

### **The members of the Reference Center for Thrombotic Microangiopathies (CNR-MAT) are:**

Augusto Jean-François (Service de Néphrologie, dialyse et transplantation ; CHU Larrey, Angers); Azoulay Elie (Service de Réanimation Médicale, Hôpital Saint-Louis, Paris); Barbay Virginie (Laboratoire d'Hématologie, CHU Charles Nicolle, Rouen); Benhamou Ygal (Service de Médecine Interne, CHU Charles Nicolle, Rouen); Bordessoule Dominique (Service d'Hématologie, Hôpital Dupuytren, Limoges); Charasse Christophe (Service de Néphrologie, Centre Hospitalier de Saint-Brieuc); Charvet-Rumpler Anne (Service d'Hématologie, CHU de Dijon) ; Chauveau Dominique (Service de Néphrologie et Immunologie Clinique, CHU Rangueil, Toulouse); Choukroun Gabriel (Service de Néphrologie, Hôpital Sud, Amiens); Coindre Jean-Philippe (Service de Néphrologie, CH Le Mans); Coppo Paul (Service d'Hématologie, Hôpital Saint-Antoine, Paris); Corre Elise (Service d'Hématologie, Hôpital Saint-Antoine, Paris); Delmas Yahsou (Service de Néphrologie, CHU de Bordeaux, Bordeaux); Deschenes Georges (Service de Néphrologie Pédiatrique, Hôpital Robert Debré, Paris); Devidas Alain (Service d'Hématologie, Hôpital Sud-Francilien, Corbeil-Essonnes); Dossier Antoine (Service de Néphrologie, Hôpital Bichat, Paris); Fain Olivier (Service de Médecine Interne, Hôpital Saint-Antoine, Paris); Fakhouri Fadi (Service de Néphrologie, CHU Hôtel-Dieu, Nantes) ; Frémeaux-Bacchi Véronique (Laboratoire d'Immunologie, Hôpital Européen Georges Pompidou, Paris); Galicier Lionel (Service d'Immunopathologie, Hôpital Saint-Louis, Paris); Grangé Steven (Service de Réanimation Médicale, CHU Charles Nicolle, Rouen) ; Guidet Bertrand (Service de Réanimation Médicale, Hôpital Saint-Antoine, Paris); Halimi Jean-Michel (Service de Néphrologie Pédiatrique, Hôpital Bretonneau, Tours); Hamidou Mohamed (Service de Médecine Interne, Hôtel-Dieu, Nantes); Herbrecht Raoul (service d'Oncologie et d'Hématologie, Hôpital de Hautepierre, Strasbourg); Hié Miguel (Service de Médecine Interne, Groupe Hospitalier Pitié-Salpêtrière, Paris) ; Jacobs Frédéric (Service de Réanimation Médicale, Hôpital Antoine Bécclère, Clamart); Joly Bérangère (Service d'Hématologie Biologique, Hôpital Lariboisière, Paris) ; Kanouni Tarik (Unité d'Hémaphrèse, Service d'Hématologie, CHU de Montpellier); Kaplanski Gilles (Service de Médecine Interne, Hôpital la Conception, Marseille) ; Lautrette Alexandre (Hôpital

Gabriel Montpied, Service de Réanimation médicale, Clermont-Ferrand); Le Guern Véronique (Unité d'Hémaphérèse, Service de Médecine Interne, Hôpital Cochin, Paris) ; Loirat Chantal (Service de Néphrologie Pédiatrique, Hôpital Robert Debré, Paris); Moulin Bruno (Service de Néphrologie, Hôpital Civil, Strasbourg); Mousson Christiane (Service de Néphrologie, CHU de Dijon); Ojeda Uribe Mario (Service d'Hématologie, Hôpital Emile Muller, Mulhouse); Ouchenir Abdelkader (Service de Réanimation, Hôpital Louis Pasteur, Le Coudray); Parquet Nathalie (Unité de Clinique Transfusionnelle, Hôpital Cochin, Paris); Peltier Julie (Urgences Néphrologiques et Transplantation Rénale, Hôpital Tenon, Paris) ; Pène Frédéric (Service de Réanimation Médicale, Hôpital Cochin, Paris) ; Perez Pierre (Service de Réanimation polyvalente, CHU de Nancy) ; Poullin Pascale (Service d'hémaphérèse et d'autotransfusion, Hôpital la Conception, Marseille); Pouteil-Noble Claire (Service de Néphrologie, CHU Lyon-Sud, Lyon); Presne Claire (Service de Néphrologie, Hôpital Nord, Amiens); Provôt François (Service de Néphrologie, Hôpital Albert Calmette, Lille); Rondeau Eric (Urgences Néphrologiques et Transplantation Rénale, Hôpital Tenon, Paris); Saheb Samir (Unité d'Hémaphérèse, Hôpital la Pitié-Salpêtrière, Paris) ; Schlemmer Benoît (Service de Réanimation Médicale, Hôpital Saint-Louis, Paris); Seguin Amélie (Service de Réanimation Médicale, centre hospitalier de Vendée) ; Servais Aude (Service de Néphrologie, CHU Necker-Enfants Malades) ; Stépanian Alain (Laboratoire d'Hématologie, Hôpital Lariboisière, Paris); Vernant Jean-Paul (Service d'Hématologie, Hôpital la Pitié-Salpêtrière, Paris); Veyradier Agnès (Service d'Hématologie Biologique, Hôpital Lariboisière, Paris); Vigneau Cécile (Service de Néphrologie, Hôpital Pontchaillou, Rennes); Wynckel Alain (Service de Néphrologie, Hôpital Maison Blanche, Reims); Zunic Patricia (Service d'Hématologie, Groupe Hospitalier Sud-Réunion, la Réunion).
